# Supplementary material for: Phase I/II Trial of Urokinase Plasminogen Activator-Targeted Oncolytic Newcastle Disease Virus for Canine Intracranial Tumors
Source: MDPI journal article supplement (doi:10.3390/cancers16030564), 2024-01-29
Supplement: s1 [file s1]

## Supplemental Material

### Phase I/II Trial of Urokinase Plasminogen Activator-Targeted Oncolytic Newcastle Disease Virus for Canine Intracranial Tumors

John H. Rossmeisl, Jamie N. King, John L. Robertson, James Weger-Lucarelli and Subbiah Elankumaran

**Supplemental Table S1. Canine Subject and Tumor Characteristics.**

| Dog | rLAS-uPA Dose Cohort       | Breed                | Age (years) | Sex | BW (kg) | Clinical Signs                                                     | Baseline KPS | Tumor Location                               | Tumor Histology                         | Baseline TTV (cm <sup>3</sup> ) | uPAR IHC Score |
|-----|----------------------------|----------------------|-------------|-----|---------|--------------------------------------------------------------------|--------------|----------------------------------------------|-----------------------------------------|---------------------------------|----------------|
| 1   | 2 x 10 <sup>4</sup> pfu/ml | Mixed breed          | 11          | FS  | 39      | Seizures, Circling                                                 | 75           | Parasagittal                                 | NA- Presumptive Meningioma              | 4.23                            | NA             |
| 2   | 2 x 10 <sup>4</sup> pfu/ml | Spitz                | 12          | FS  | 9       | Seizures                                                           | 90           | Cystic olfactory                             | NA-Presumptive Meningioma               | 1.09                            | NA             |
| 3   | 2 x 10 <sup>4</sup> pfu/ml | Border Terrier       | 5           | MN  | 7       | Seizures                                                           | 90           | Cerebral convexity                           | Grade II Meningioma                     | 2.78                            | 3              |
| 4   | 2 x 10 <sup>5</sup> pfu/ml | Jack Russell Terrier | 8           | MN  | 8       | Chiasmal blindness                                                 | 90           | Parasellar                                   | NA- Presumptive Meningioma              | 1.13                            | NA             |
| 5   | 2 x 10 <sup>5</sup> pfu/ml | Boxer                | 12          | MN  | 31      | Seizures, thalamocortical visual deficit                           | 80           | Parasagittal                                 | Grade I Meningioma                      | 6.71                            | 2              |
| 6   | 2 x 10 <sup>5</sup> pfu/ml | Irish Setter         | 11          | MN  | 23      | Seizures                                                           | 80           | Falcine                                      | Grade I Meningioma                      | 5.69                            | 2              |
| 7   | 2 x 10 <sup>7</sup> pfu/ml | German Shepherd      | 10          | FS  | 34      | Seizures                                                           | 70           | Cerebral convexity                           | NA- Presumptive Meningioma              | 8.14                            | NA             |
| 8   | 2 x 10 <sup>7</sup> pfu/ml | Boston Terrier       | 8           | FS  | 11      | Seizures, behavior change                                          | 70           | Thalamic                                     | High-grade astrocytoma                  | 2.15                            | 6              |
| 9   | 2 x 10 <sup>7</sup> pfu/ml | Mixed breed          | 9           | FS  | 13      | Unilateral masticatory muscle atrophy                              | 90           | Extra-axial mass at level of pons            | Schwannoma                              | 1.62                            | 3              |
| 10  | 2 x 10 <sup>9</sup> pfu/ml | Chow                 | 7           | MN  | 22      | Central vestibular dysfunction                                     | 70           | Tentorial                                    | Grade II Meningioma                     | 1.96                            | 3              |
| 11  | 2 x 10 <sup>9</sup> pfu/ml | Mixed breed          | 7           | MN  | 27      | Seizures, Hemi-inattention                                         | 80           | Cerebral convexity/ En-plaque                | Grade I Meningioma                      | 1.85                            | 3              |
| 12  | 2 x 10 <sup>7</sup> pfu/ml | Fox Terrier          | 9           | FS  | 9       | Unilateral cavernous sinus syndrome and masticatory muscle atrophy | 70           | Extra-axial mass at level mesencephalon/pons | Malignant Peripheral Nerve Sheath Tumor | 1.29                            | 5              |
| 13  | 2 x 10 <sup>7</sup> pfu/ml | Rottweiler           | 10          | MN  | 42      | Seizures                                                           | 80           | Parasagittal                                 | Grade I Meningioma                      | 8.23                            | 2              |
| 14  | 2 x 10 <sup>7</sup> pfu/ml | Golden Retriever     | 11          | FS  | 26      | Seizures                                                           | 90           | Olfactory                                    | Grade II Meningioma                     | 5.12                            | 4              |
| 15  | 2 x 10 <sup>7</sup> pfu/ml | French Bulldog       | 6           | FS  | 13      | Seizures, circling                                                 | 70           | Hemispheric                                  | High-grade oligodendroglioma            | 3.29                            | 5              |
| 16  | 2 x 10 <sup>7</sup> pfu/ml | Golden Retriever     | 5           | MN  | 26      | Paradoxical central vestibular syndrome                            | 70           | Cerebelloponto-medullary angle               | Choroid plexus papilloma                | 2.24                            | 6              |
| 17  | 2 x 10 <sup>7</sup> pfu/ml | Boxer-X              | 7           | MN  | 2146    | Seizures                                                           | 90           | Hemispheric                                  | Low-grade oligodendroglioma             | 3.78                            | 3              |
| 18  | 2 x 10 <sup>7</sup> pfu/ml | Am Staff Terrier     | 5           | FS  | 38      | Circling, head pressing                                            | 70           | Lateral ventricle                            | Choroid plexus carcinoma                | 5.54                            | 5              |
| 19  | 2 x 10 <sup>7</sup> pfu/ml | Boston Terrier       | 9           | MN  | 10      | Seizures                                                           | 90           | Hemispheric                                  | High-grade oligodendroglioma            | 2.67                            | 4              |
| 20  | 2 x 10 <sup>7</sup> pfu/ml | Beagle               | 10          | MN  | 11      | Seizures                                                           | 90           | Parasellar                                   | Grade I Meningioma                      | 1.96                            | 2              |

#### Table S1 Key

IHC= Immunohistochemistry; NA= not applicable

KPS= Karnofsky Performance Score

NA= Data not available

TTV= T2 Total Tumor Volume

**Supplemental Table S2. Canine Subject Off-protocol Clinical and Follow-up Data.**

| Dog | rLAS-uPA Dose Cohort       | Tumor Histology                         | Pre-Enrollment Treatment | Post-trial Treatment                   | Follow-up Duration (Days from Trial Enrollment) | Outcome                      |
|-----|----------------------------|-----------------------------------------|--------------------------|----------------------------------------|-------------------------------------------------|------------------------------|
| 1   | 2 x 10 <sup>4</sup> pfu/ml | NA- Presumptive Meningioma              | None                     | None                                   | 46                                              | Death SD- Status Epilepticus |
| 2   | 2 x 10 <sup>4</sup> pfu/ml | NA-Presumptive Meningioma               | None                     | None                                   | 242                                             | Death PD                     |
| 3   | 2 x 10 <sup>4</sup> pfu/ml | Grade II Meningioma                     | Surgery                  | Investigational, Surgery, Radiotherapy | 789                                             | Death PD                     |
| 4   | 2 x 10 <sup>5</sup> pfu/ml | NA- Presumptive Meningioma              | None                     | None                                   | 623                                             | Death Presumed PD            |
| 5   | 2 x 10 <sup>5</sup> pfu/ml | Grade I Meningioma                      | Surgery                  | None                                   | 265                                             | LTF- Unknown                 |
| 6   | 2 x 10 <sup>5</sup> pfu/ml | Grade I Meningioma                      | Surgery                  | None                                   | 419                                             | Death PD                     |
| 7   | 2 x 10 <sup>7</sup> pfu/ml | NA- Presumptive Meningioma              | None                     | None                                   | 164                                             | Death Presumed PD            |
| 8   | 2 x 10 <sup>7</sup> pfu/ml | High-grade astrocytoma                  | Temozolomide             | Radiotherapy                           | 316                                             | Death Presumed PD            |
| 9   | 2 x 10 <sup>7</sup> pfu/ml | Schwannoma                              | Surgery                  | None                                   | 224                                             | LTF- Unknown                 |
| 10  | 2 x 10 <sup>9</sup> pfu/ml | Grade II Meningioma                     | Investigational          | None                                   | 275                                             | Death UD                     |
| 11  | 2 x 10 <sup>9</sup> pfu/ml | Grade I Meningioma                      | Investigational          | Surgery                                | 195                                             | LTF- Unknown                 |
| 12  | 2 x 10 <sup>7</sup> pfu/ml | Malignant Peripheral Nerve Sheath Tumor | Surgery                  | None                                   | 221                                             | Death Presumed PD            |
| 13  | 2 x 10 <sup>7</sup> pfu/ml | Grade I Meningioma                      | Hydroxyurea              | Surgery, Investigational               | 562                                             | Death PD                     |
| 14  | 2 x 10 <sup>7</sup> pfu/ml | Grade II Meningioma                     | Surgery                  | None                                   | 271                                             | Death PD                     |
| 15  | 2 x 10 <sup>7</sup> pfu/ml | High-grade oligodendroglioma            | Investigational          | Investigational                        | 340                                             | Death PD                     |
| 16  | 2 x 10 <sup>7</sup> pfu/ml | Choroid plexus papilloma                | Radiotherapy             | None                                   | 303                                             | LTF- Unknown                 |
| 17  | 2 x 10 <sup>7</sup> pfu/ml | Low-grade oligodendroglioma             | Surgery                  | Investigational                        | 635                                             | Death SD- Seizures           |
| 18  | 2 x 10 <sup>7</sup> pfu/ml | Choroid plexus carcinoma                | Radiotherapy             | None                                   | 107                                             | Death PD                     |
| 19  | 2 x 10 <sup>7</sup> pfu/ml | High-grade oligodendroglioma            | Lomustine                | None                                   | 298                                             | Death PD                     |
| 20  | 2 x 10 <sup>7</sup> pfu/ml | Grade I Meningioma                      | Hydroxyurea              | Surgery                                | 528                                             | Death PD                     |

**Table S2 Key**

LTF= Lost to follow-up

PD= Progressive disease (confirmed with MRI and/or necropsy examination)

Presumed PD= Presumed progressive disease with intensification of pre-existing tumor-related neurologic signs or development of new neurologic signs

SD= Stable disease

UD= Disease unrelated to tumor

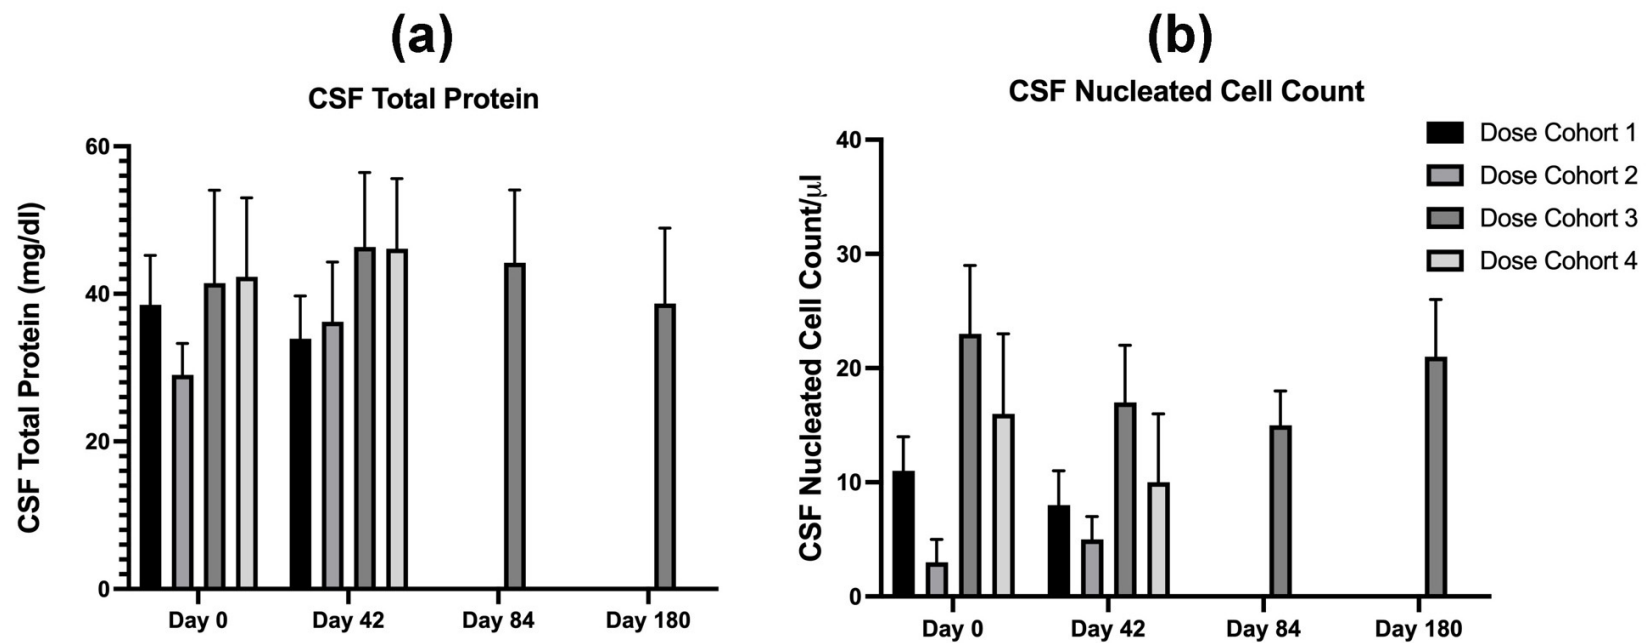

**Figure S1. Cerebrospinal Fluid (CSF) Total Protein and Nucleated Cell Counts in Canine Subjects.** Legend- rLAS-UPA treatment was not associated with statistically significant changes in CSF total protein (a) or nucleated cell counts (b) in canine subjects.
